# Supplementary material for: Antiproliferative, Cytotoxic, and Apoptotic Activity of Steroidal Oximes in Cervicouterine Cell Lines
Source: MDPI journal article supplement (doi:10.3390/molecules21111533), 2016-11-14
Supplement: s1 [file s1]

# Supplementary Materials: Antiproliferative, Cytotoxic, and Apoptotic Activity of Steroidal Oximes in Cervicouterine Cell Lines

Luis Sánchez-Sánchez, María Guadalupe Hernández-Linares, María L. Escobar, Hugo López-Muñoz, Edgar Zenteno, María A. Fernández-Herrera, Gabriel Guerrero-Luna, Alan Carrasco-Carballo and Jesús Sandoval-Ramírez

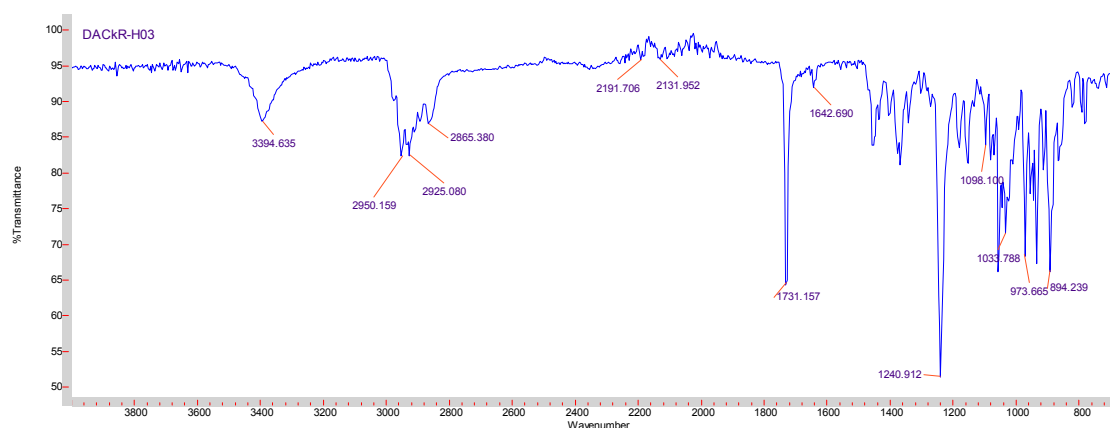

Figure S1. IR spectrum of the oxime of (22S,23R)-acetyldiosgenin acetate (4).

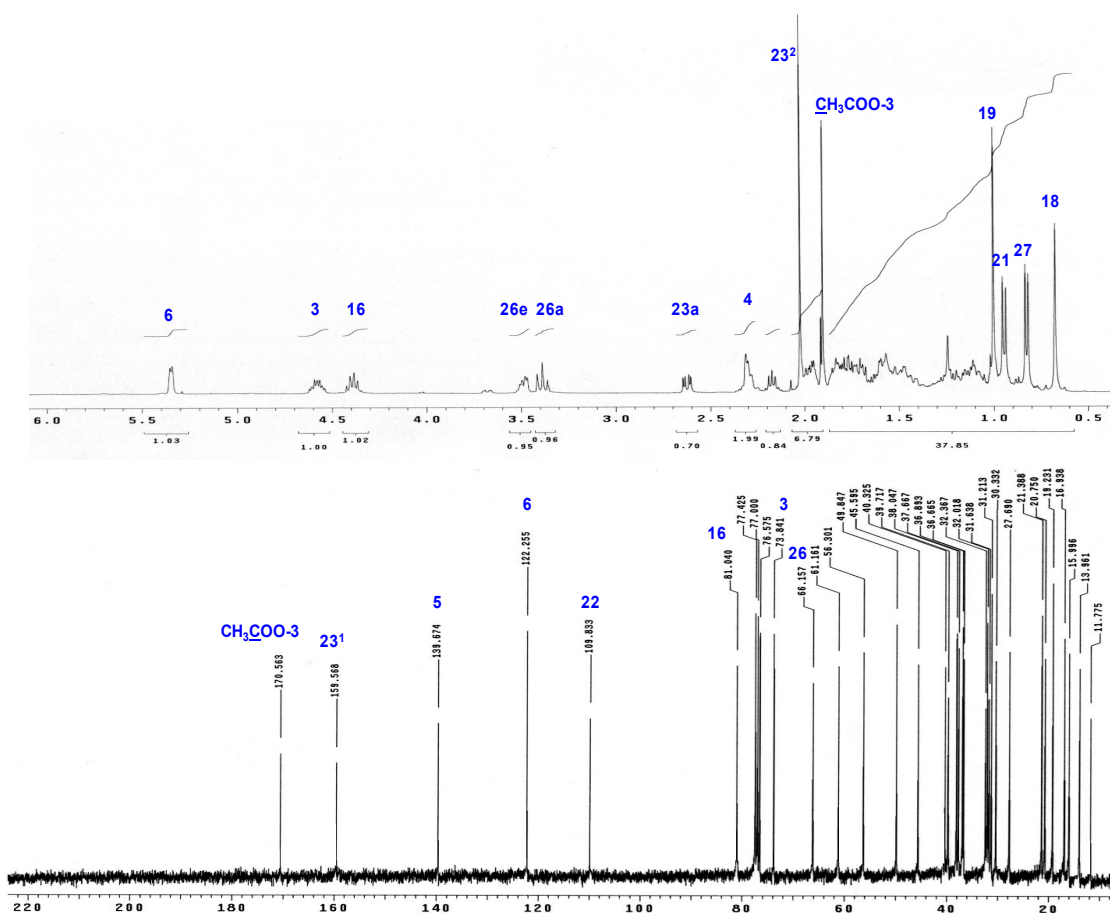

Figure S2.  $^1\text{H}$ -NMR and  $^{13}\text{C}$ -NMR spectra of the oxime of (22S,23R)-acetyldiosgenin acetate (4).

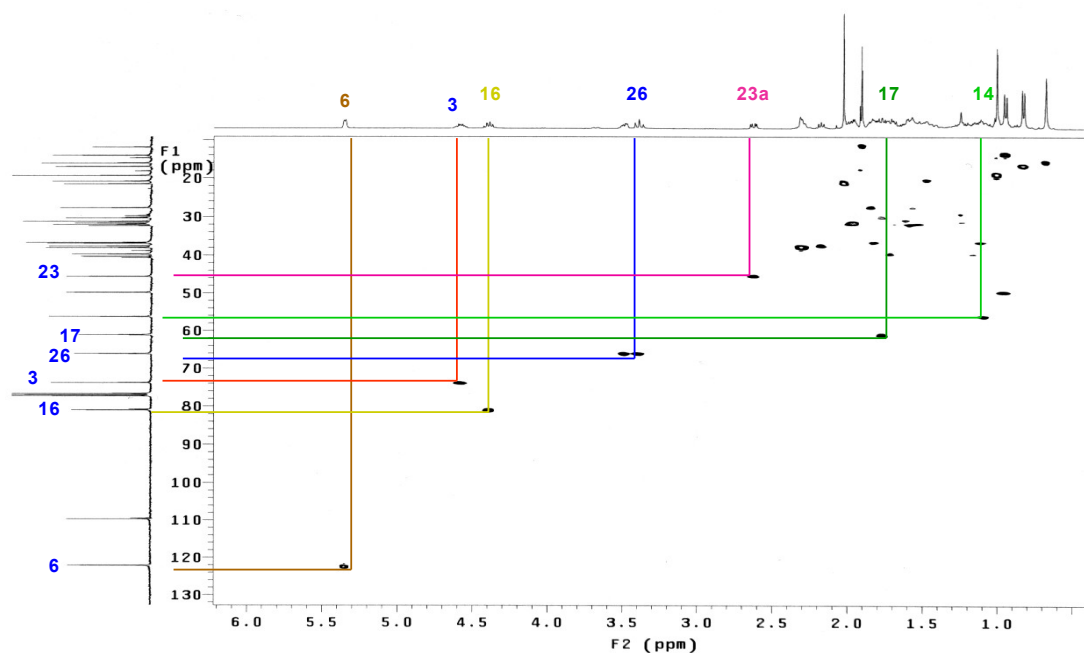

Figure S3. HSQC experiment of the oxime of (22S,23R)-acetyldiosgenin acetate (4).

[ Elemental Composition ]  
 Data : Dr-Cuevas-Gabriel021 Date : 28-Jun-2016 18:36 Page: 1  
 Sample: 2556 MG54D JeolSX102A  
 Note : Operadores Carmen Garcia javier Perez  
 Inlet : Direct Ion Mode : EI+  
 RT : 1.13 min Scan#: (7,10)  
 Elements : C 40/0, H 69/0, O 7/3, N 2/1  
 Mass Tolerance : 1000ppm, 3mmu if m/z < 3, 5mmu if m/z > 5  
 Unsaturation (U.S.) : -0.5 - 15.0

| Observed m/z | Int% | Estimated m/z | Error[ppm] | U.S. | C  | H  | O | N |
|--------------|------|---------------|------------|------|----|----|---|---|
| 513.3445     | 10.6 | 513.3454      | -1.7       | 9.0  | 31 | 47 | 5 | 1 |

Figure S4. Data from the high resolution mass spectrum of the oxime 4.

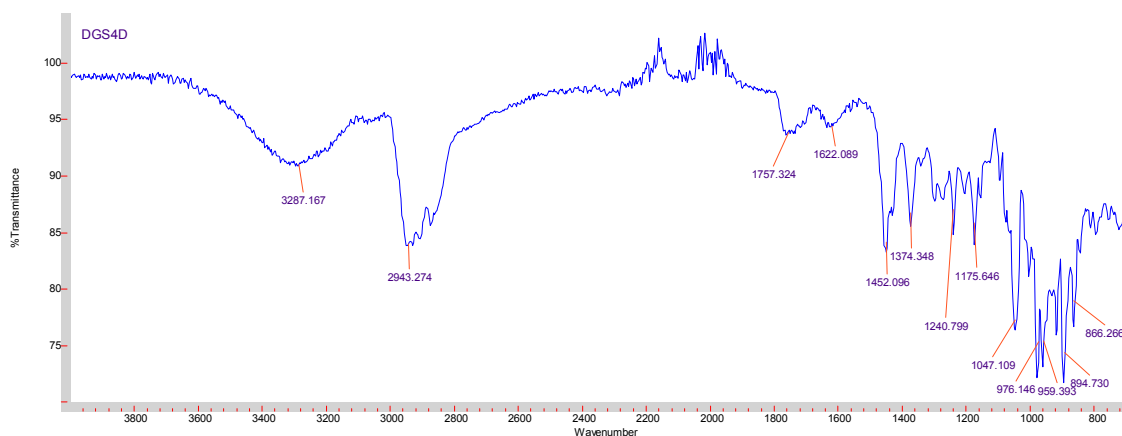

Figure S5. IR spectrum of the dioxime of (22S,25R)-spirost-4-en-3,6-dione (5).

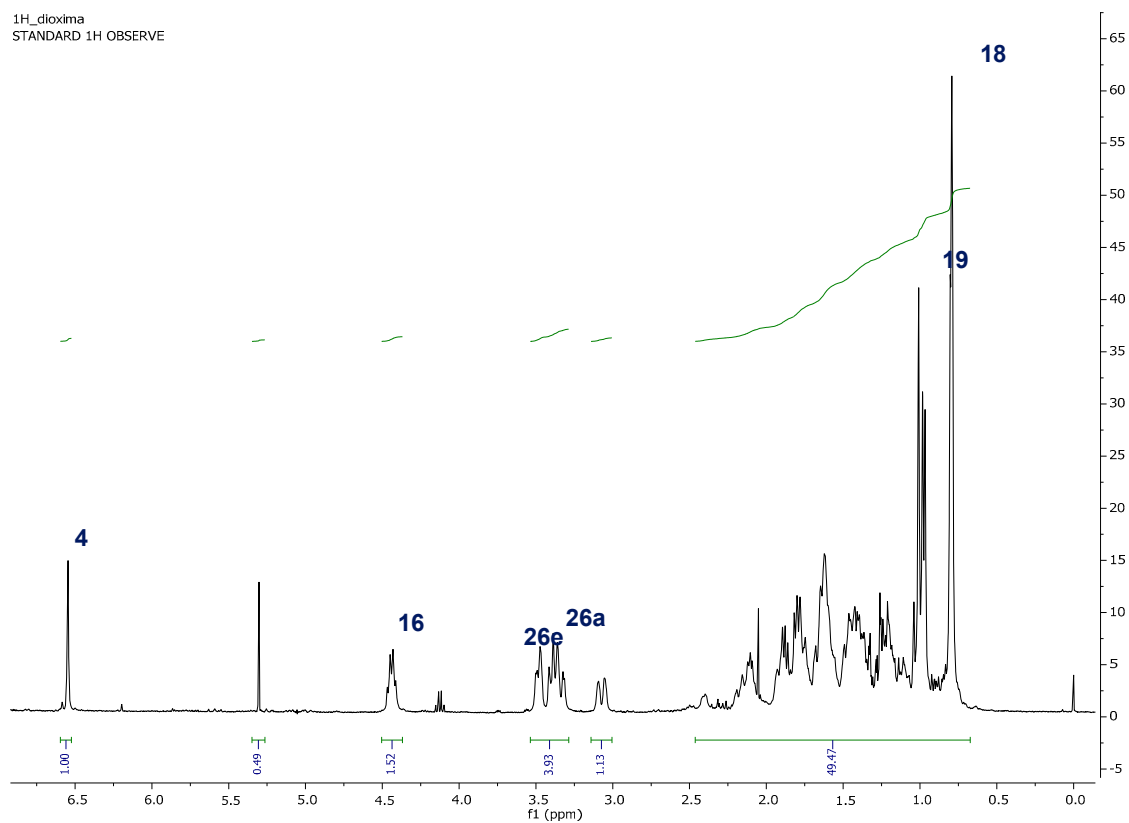Figure S6. <sup>1</sup>H-NMR spectrum of the dioxime of (22S,25R)-spirost-4-en-3,6-dione (5).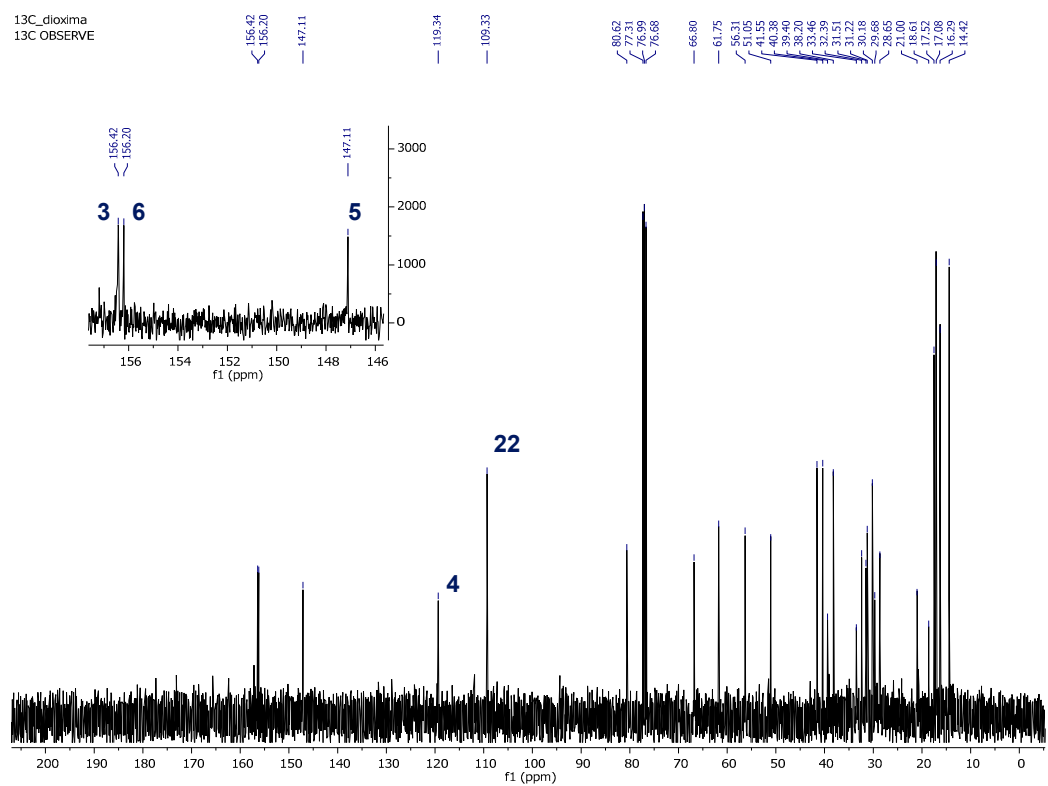Figure S7. <sup>13</sup>C-NMR spectrum of the dioxime of (22S,25R)-spirost-4-en-3,6-dione (5).

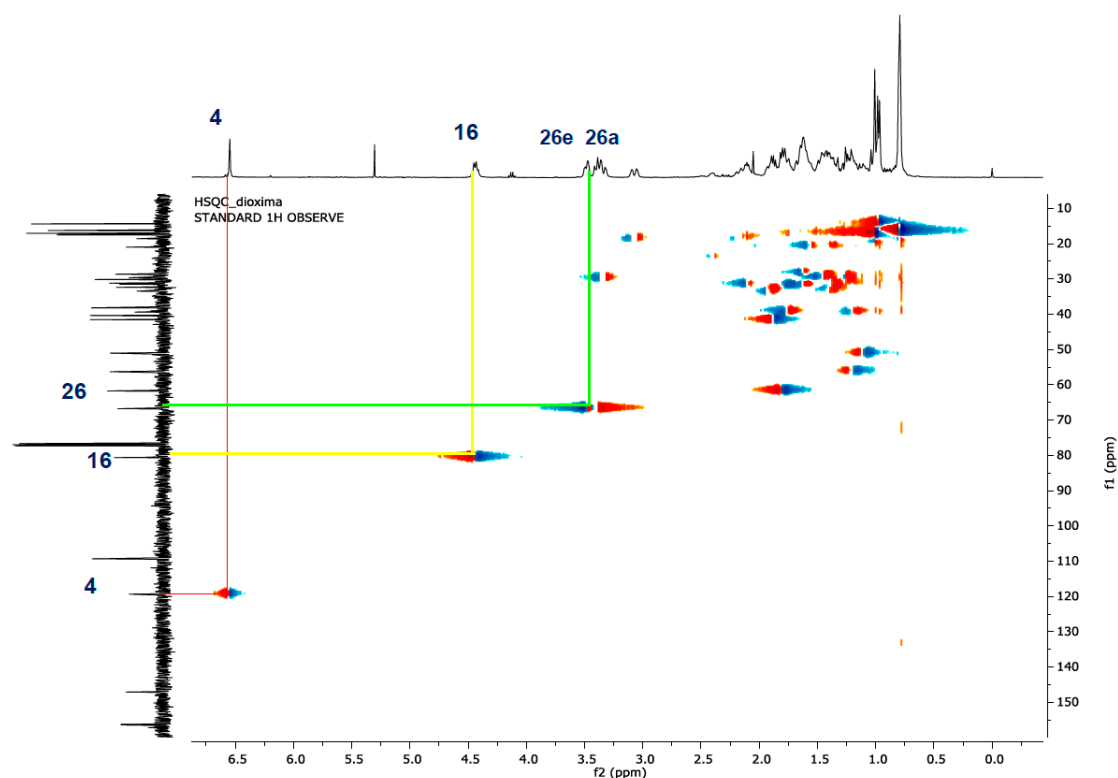

Figure S8. HSQC experiment of the dioxime of (22S,25R)-spirost-4-en-3,6-dione (5).

[ Elemental Composition ]

Page: 1

Data : Dr-Cuevas-Gabriel020 Date : 28-Jun-2016 18:30  
 Sample: 2555 DG54D JeolSX102A  
 Note : Operadores Carmen Garcia javier Perez  
 Inlet : Direct Ion Mode : EI+  
 RT: 0.98 min Scan#: (6,9)  
 Elements : C 40/0, H 69/0, O 5/2, N 3/1  
 Mass Tolerance : 1000ppm, 3mmu if m/z < 3, 5mmu if m/z > 5  
 Unsaturation (U.S.) : -0.5 - 15.0

| Observed m/z | Int% | Estimated m/z | Error [ppm] | U.S. | C  | H  | O | N |
|--------------|------|---------------|-------------|------|----|----|---|---|
| 456.2982     | 75.0 |               |             |      |    |    |   |   |
| 456.2988     | -1.2 |               |             | 9.0  | 27 | 40 | 4 | 2 |

Figure S9. Data from the high resolution mass spectrum of the dioxime 5.

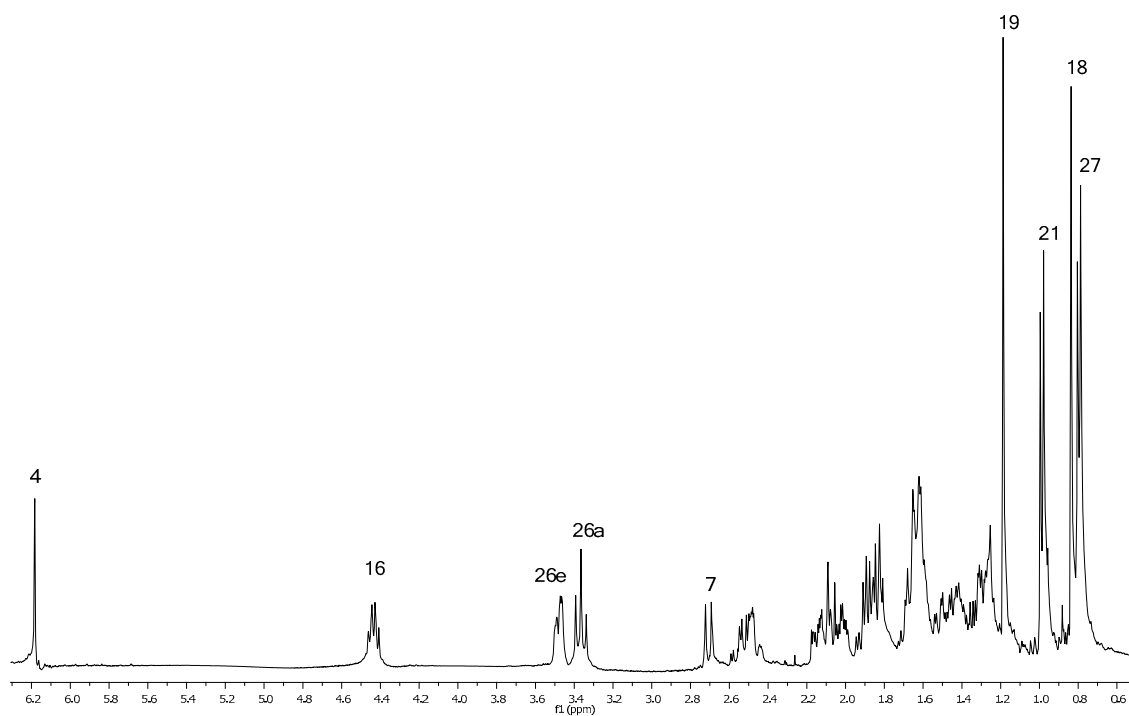

**Figure S10.** <sup>1</sup>H-NMR spectrum (500 MHz) of (22S,25R)-spirost-4-en-3,6-dione 9.

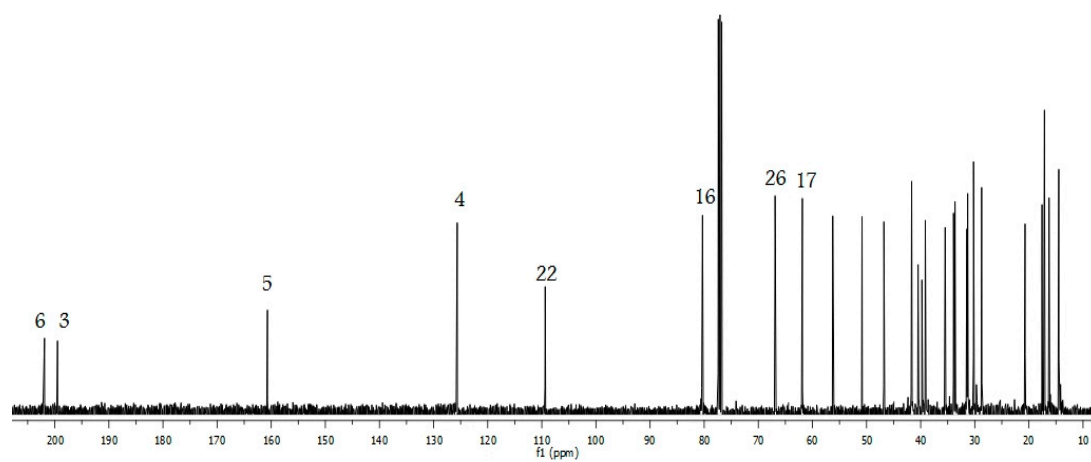

**Figure S11.** <sup>13</sup>C-NMR spectrum (125 MHz) of (22S,25R)-spirost-4-en-3,6-dione 9.

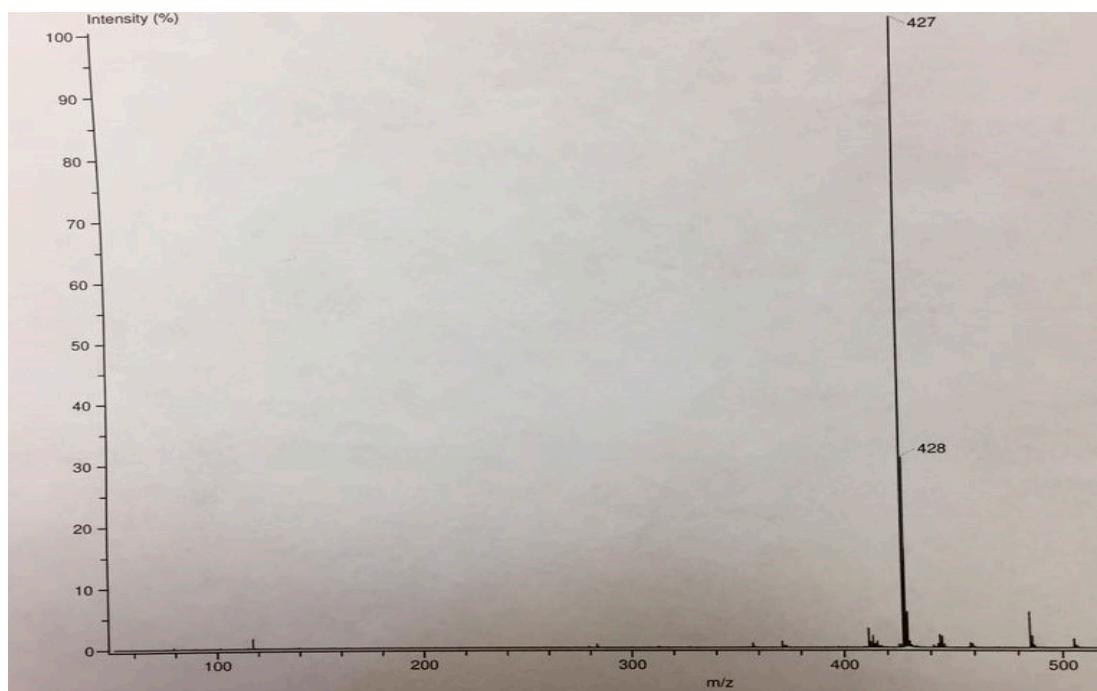

Figure S12. MS of (22*S*,25*R*)-spirost-4-en-3,6-dione 9.

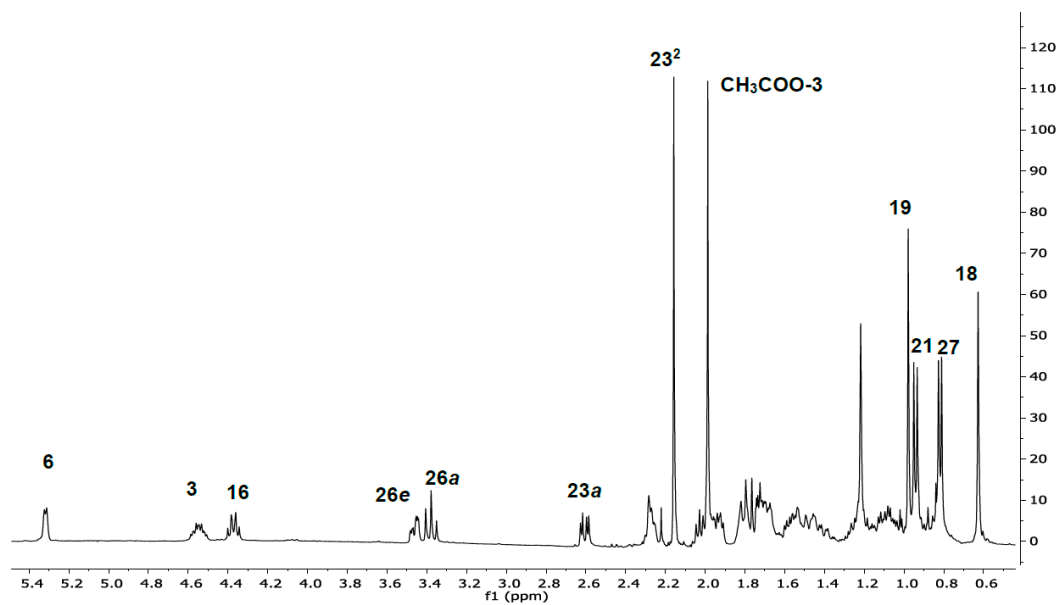

Figure S13. <sup>1</sup>H-NMR spectrum (500 MHz) of (23*R*)-acetyldiosgenin acetate 8.

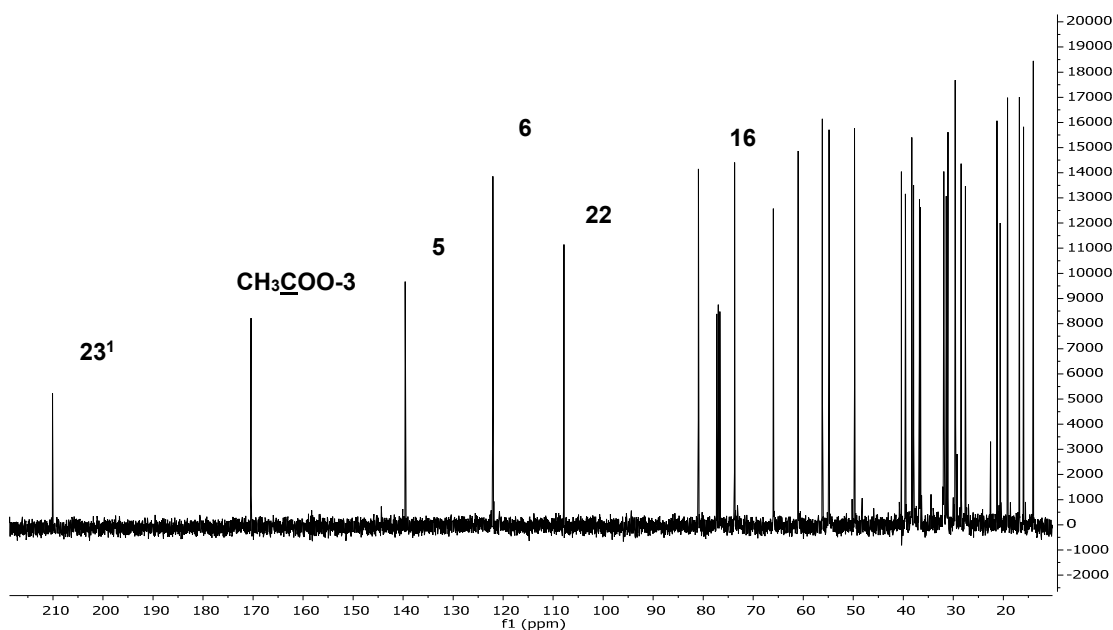

Figure S14.  $^{13}\text{C}$ -NMR spectrum (125 MHz) of (23R)-acetyldiosgenin acetate 8.

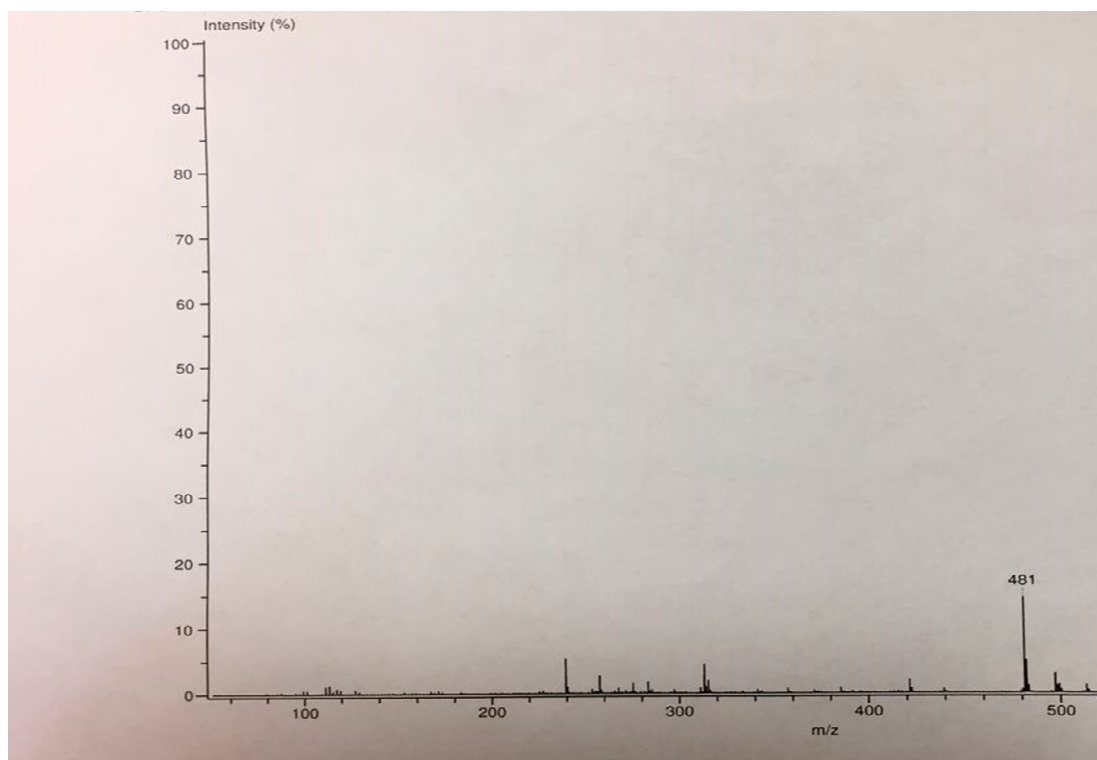

Figure S15. MS of (23R)-acetyldiosgenin acetate 8.

Minimum energy structures of the *anti* isomer (Figure S16), and *syn* isomer (Figure S17). Figure S17 shows the *syn* isomer, where  $\text{CH}_3\text{-}23^2$  has a distance of 4.22 Å on average, with respect to  $\text{CH}_3\text{-}21$ , by free rotation; so we would expect to observe a NOE-effect when irradiated  $\text{CH}_3\text{-}23^2$  expecting to affect the  $\text{CH}_3\text{-}21$ , which is not observed (see Figure S18). However, when the case of the *anti* isomer is analyzed, the distance from  $\text{CH}_3\text{-}21$  to  $\text{CH}_3\text{-}23^2$  has a distance of 6.45 Å, which would not allow a direct NOE-effect and not would be observed when irradiated with  $\text{CH}_3\text{-}23^2$ , as it was established in this experiment.

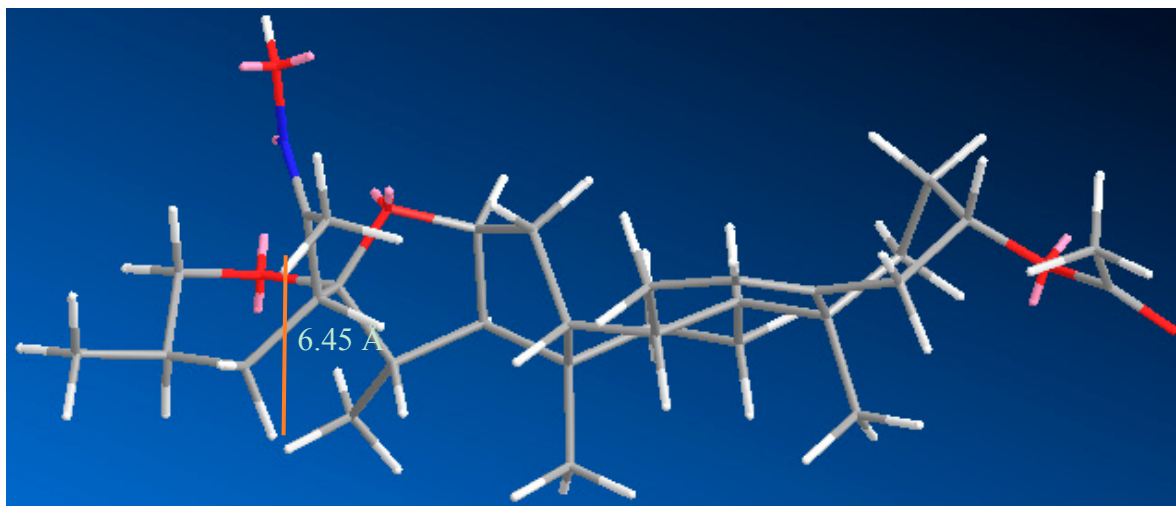

**Figure S16.** Structure optimized (MM2) of *anti* isomer of oxime **4**, and distance through space between CH<sub>3</sub>-21 and CH<sub>3</sub>-23<sup>2</sup>.

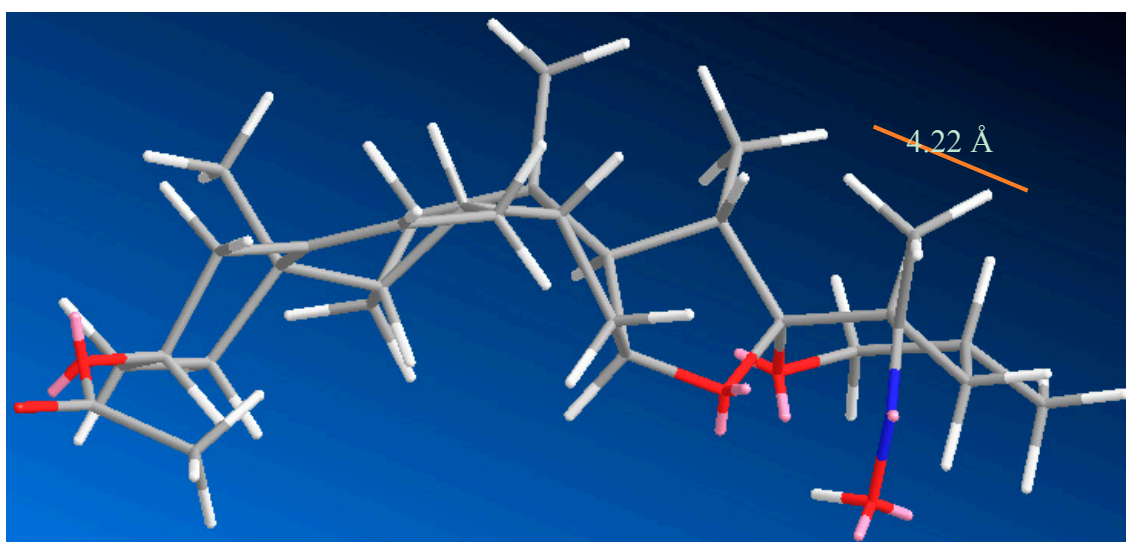

**Figure S17.** Structure optimized (MM2) of hypothetical *syn* isomer of oxime **4**, and distance through space between CH<sub>3</sub>-21 and CH<sub>3</sub>-23<sup>2</sup>.

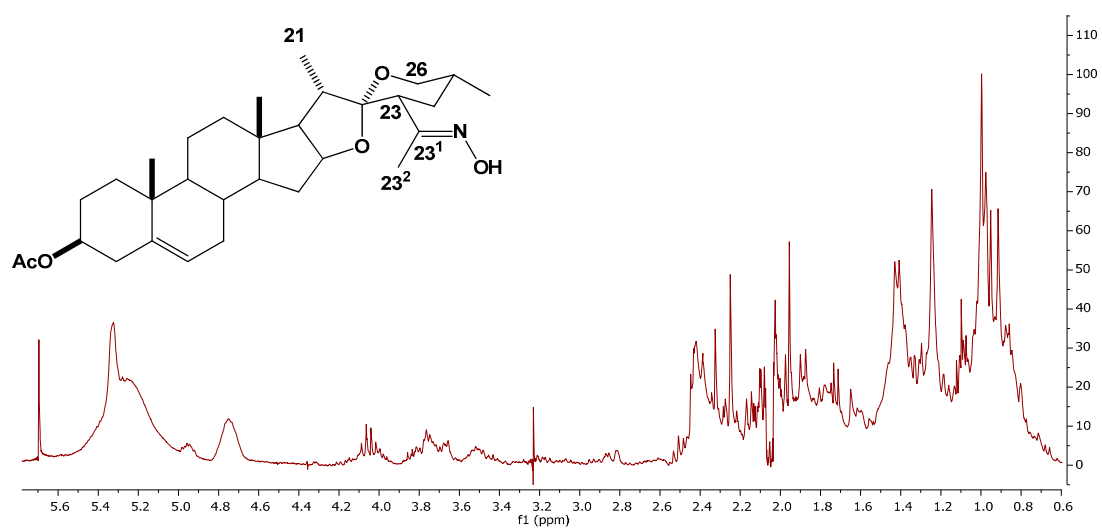

**Figure S18.** NMR-NOE experiment (300 MHz) of the protons CH<sub>3</sub>-23<sup>2</sup> that show only affects H-26eq.



A NOE-effect was observed around 3.3 ppm when  $\text{CH}_3\text{-23}^2$  is irradiated, due to the distance at the  $\text{H-26eq}$  (4.5 Å, see Figure S19); however, in the geometric isomer *syn* (Figure S20), the distance to this proton from  $\text{CH}_3\text{-23}^2$  corresponding to 5.77 Å, so one should not observe this phenomenon, thus demonstrating that the geometry of the oxime **4** is *anti*.

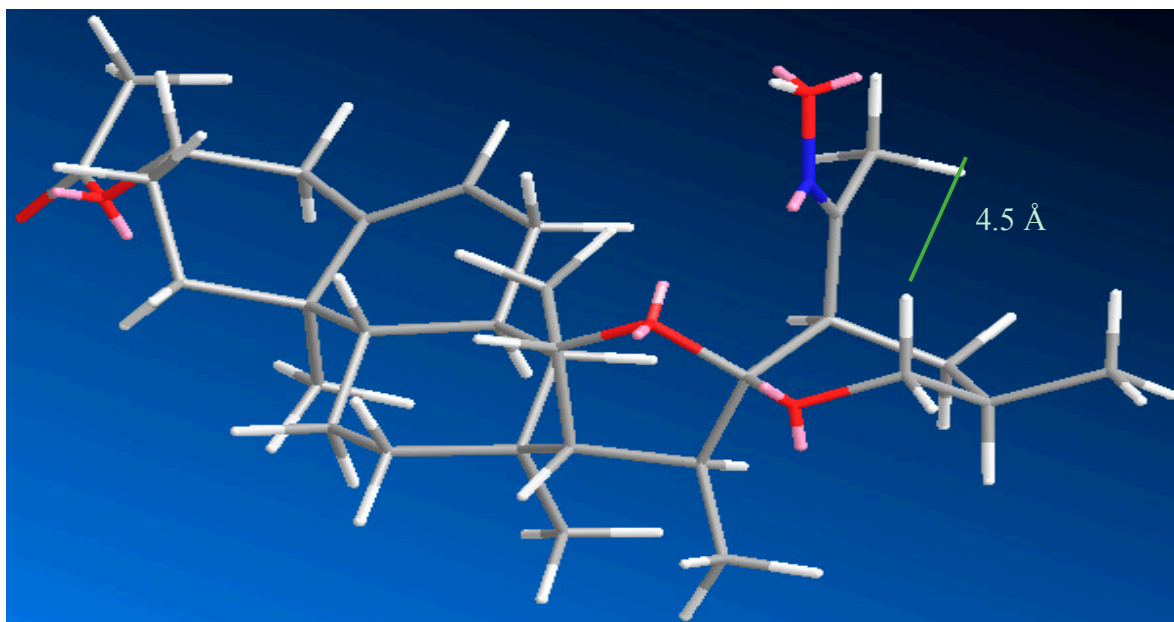

**Figure S19.** Structure optimized (MM2) of *anti* isomer of oxime **4**, and distance through space between  $\text{CH}_3\text{-21}$  and  $\text{H-26eq}$ .

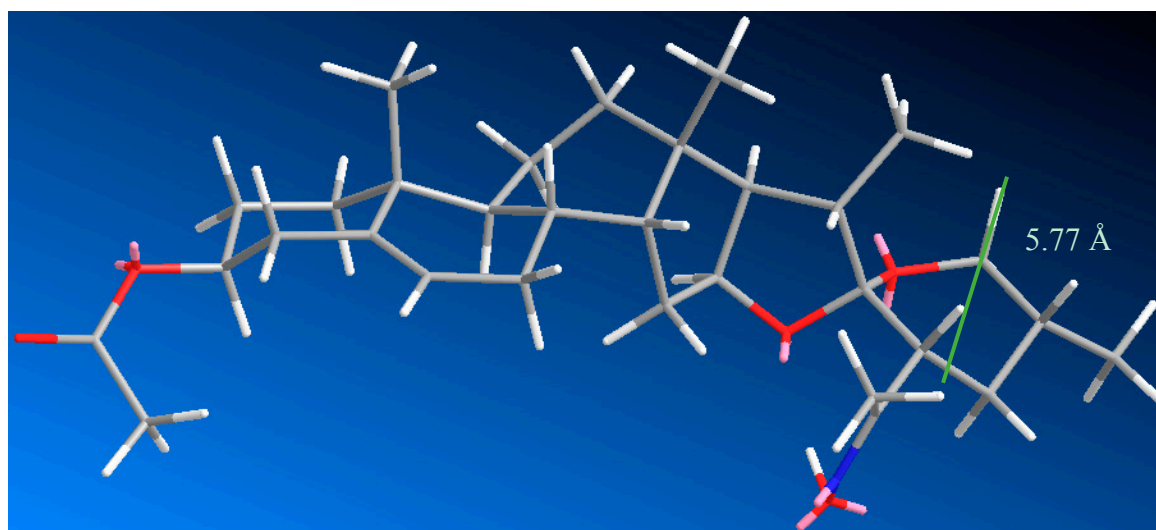

**Figure S20.** Structure optimized (MM2) of hypothetical *syn* isomer of oxime **4**, and distance through space between  $\text{CH}_3\text{-23}^2$  and  $\text{H-26eq}$ .

The NOESY experiment was performed (500 MHz), in Figure S21 shows that there is no correlation between  $\text{CH}_3\text{-23}^2$  and  $\text{CH}_3\text{-21}$ , as previously described above. Additionally, in Figure S22, the correlation is confirmed through space between  $\text{CH}_3\text{-23}^2$  and  $\text{H-26eq}$ .

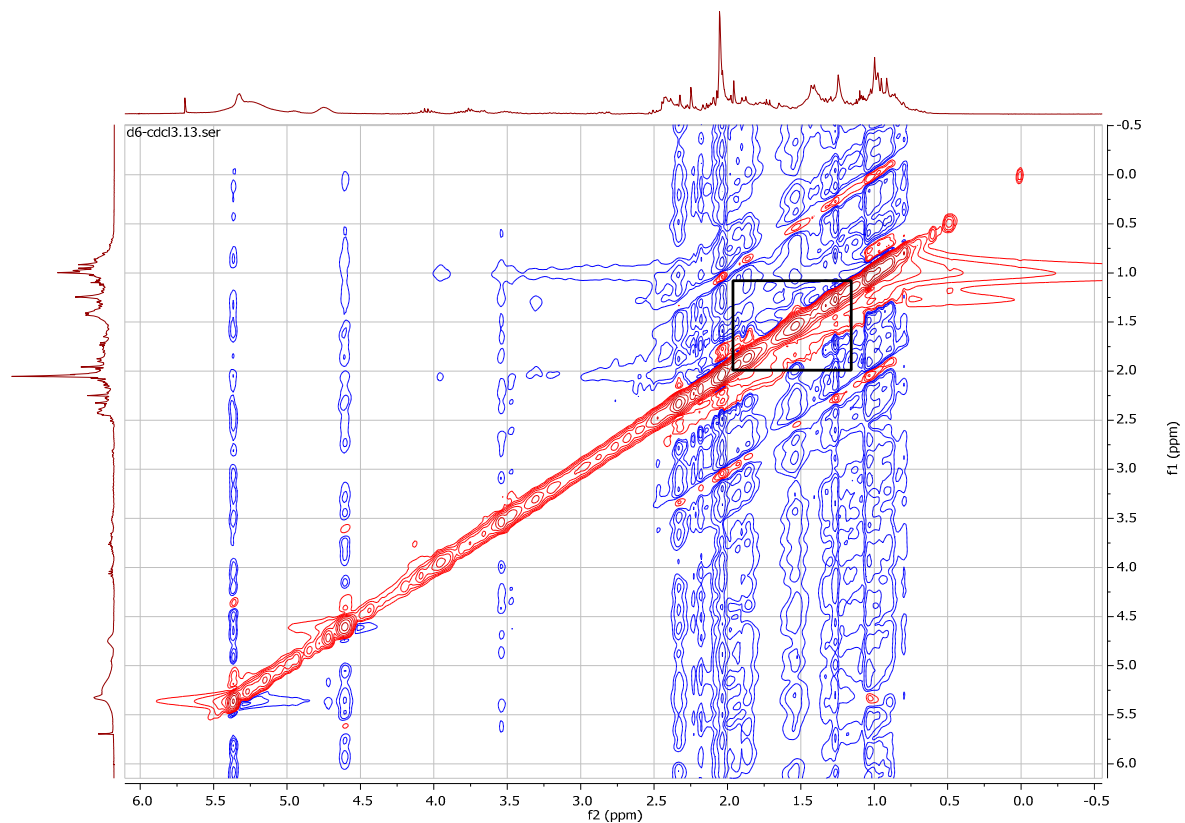

**Figure S21.** NMR-NOESY spectrum (500 MHz) of oxime **4**, which shows that there is no correlation through space between CH<sub>3</sub>-23<sup>2</sup> to CH<sub>3</sub>-21.

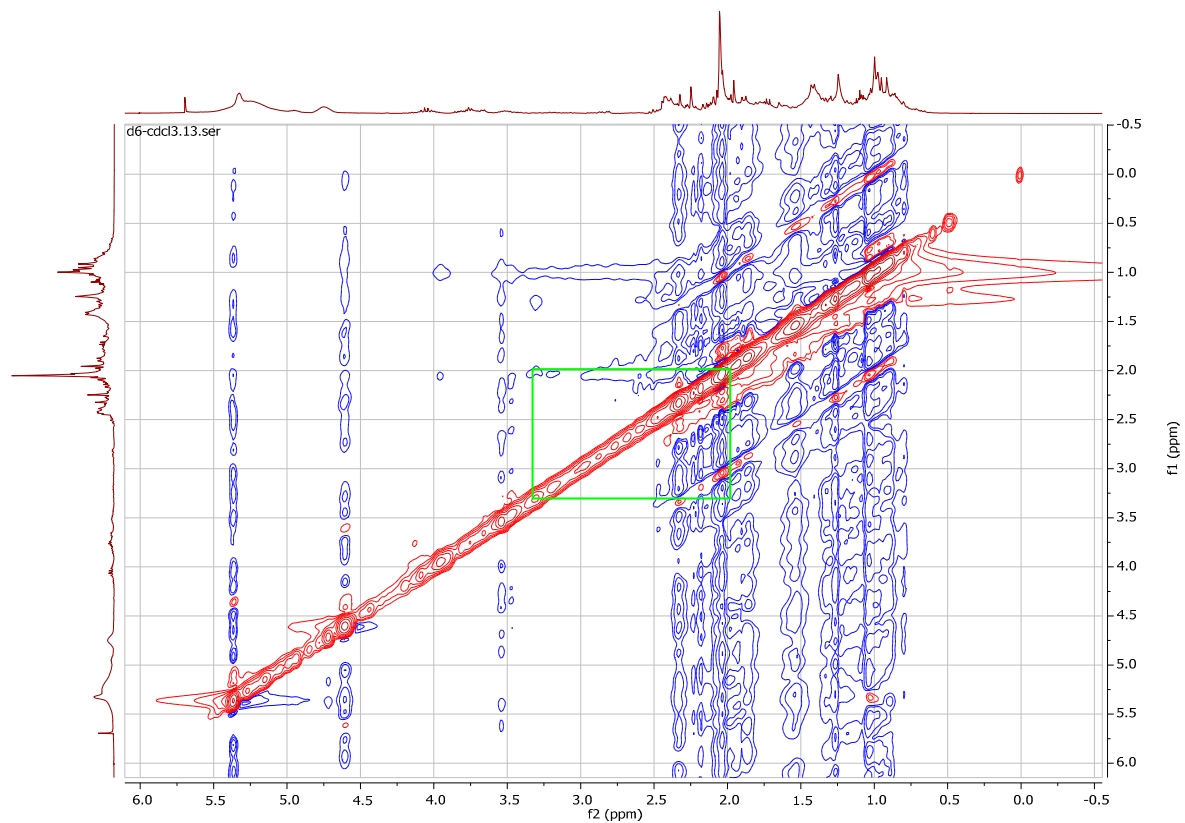

**Figure S22.** NMR-NOESY spectrum (500 MHz) of oxime **4**, which shows that there is no correlation through space between CH<sub>3</sub>-23<sup>2</sup> to H-26<sub>eq</sub>.
